# Supplementary material
Source: PubMed Central journal article supplement (PMC6897324)
Supplement: NIHMS1540060-supplement-Supp_1.pdf [file NIHMS1540060-supplement-Supp_1.pdf]

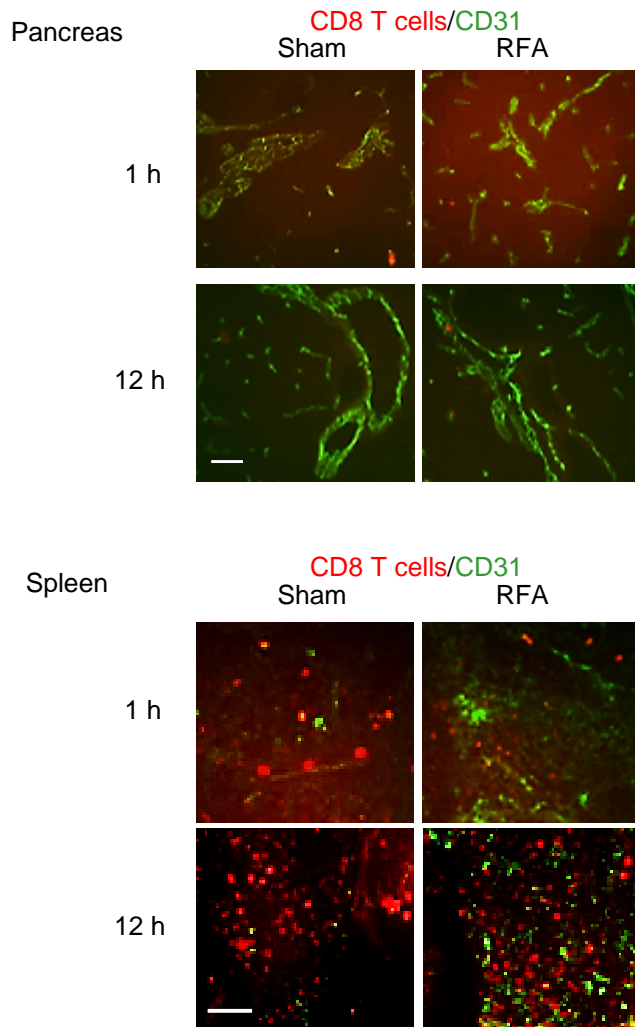

**Supplemental Table 1. Statistical analysis of growth delay of B16-OVA and parental B16F10 tumors during RFA + ACT**

| <b>B16-OVA†</b>         |       |        |        |        |        |        |        |        |        |        |
|-------------------------|-------|--------|--------|--------|--------|--------|--------|--------|--------|--------|
|                         | Day 9 | Day 11 | Day 14 | Day 16 | Day 19 | Day 21 | Day 23 | Day 26 | Day 29 | Day 33 |
| RFA + ACT vs RFA        | ns    | ns     | ns     | **     | **     | **     | **     | **     | #      | #      |
| RFA + ACT vs Sham + ACT | ns    | ns     | *      | **     | **     | **     | **     | *      | *      | *      |
| RFA + ACT vs Sham       | ns    | ns     | **     | **     | **     | #      | #      | #      | #      | #      |
| RFA vs Sham + ACT       | ns    | ns     | ns     | ns     | ns     | ns     | *      | ns     | #      | #      |
| RFA vs Sham             | ns    | ns     | **     | **     | **     | #      | #      | #      | #      | #      |
| Sham + ACT vs Sham      | ns    | ns     | ns     | ns     | **     | #      | #      | #      | #      | #      |

| <b>B16F10†</b>          |       |        |        |        |        |        |        |        |
|-------------------------|-------|--------|--------|--------|--------|--------|--------|--------|
|                         | Day 9 | Day 11 | Day 14 | Day 16 | Day 19 | Day 21 | Day 23 | Day 26 |
| RFA + ACT vs RFA        | ns    | ns     | ns     | ns     | ns     | ns     | ns     | ns     |
| RFA + ACT vs Sham + ACT | ns    | ns     | **     | **     | **     | #      | #      | #      |
| RFA + ACT vs Sham       | ns    | ns     | **     | **     | **     | #      | #      | #      |
| RFA vs Sham + ACT       | ns    | ns     | **     | **     | **     | #      | #      | #      |
| RFA vs Sham             | ns    | ns     | **     | **     | **     | #      | #      | #      |
| Sham + ACT vs Sham      | ns    | ns     | ns     | ns     | ns     | #      | #      | #      |

†Statistical comparisons of B16-OVA and B16F10 tumor volume between all treatment groups at all timepoints measured for data shown in Figure 6A. \* $P < 0.05$ ; \*\* $P < 0.01$  using Mann-Whitney U test; ns = not significant, # = comparison cannot be made as one group has been removed from the study.

**Supplemental Table 2. Statistical analysis of growth delay of CT26-HA tumors during RFA + ACT**

| CT26-HA†                |       |        |        |        |        |        |        |        |        |        |
|-------------------------|-------|--------|--------|--------|--------|--------|--------|--------|--------|--------|
|                         | Day 9 | Day 11 | Day 15 | Day 18 | Day 21 | Day 23 | Day 25 | Day 28 | Day 32 | Day 35 |
| RFA + ACT vs RFA        | ns    | ns     | ns     | ns     | *      | **     | *      | **     | **     | *      |
| RFA + ACT vs Sham + ACT | ns    | ns     | **     | **     | **     | **     | **     | **     | **     | #      |
| RFA + ACT vs Sham       | ns    | **     | **     | **     | **     | **     | **     | **     | #      | #      |
| RFA vs Sham + ACT       | ns    | ns     | **     | **     | **     | **     | **     | **     | *      | #      |
| RFA vs Sham             | ns    | **     | **     | **     | **     | **     | **     | **     | #      | #      |
| Sham + ACT vs Sham      | ns    | **     | ns     | ns     | ns     | ns     | ns     | ns     | #      | #      |

†Statistical comparisons of CT26-HA tumor volume between all treatment groups at all timepoints measured for data shown in Figure 6B. \* $P < 0.05$ ; \*\* $P < 0.01$  using Mann-Whitney U test; ns = not significant, # = comparison cannot be made as one group has been removed from the study.
